# Supplementary material for: Risk factors and predictive modeling for blood transfusion in extremely preterm infants: The role of perinatal factors and clinical outcomes
Source: Research Square preprint supplement (doi:10.21203/rs.3.rs-7994284/v1), 2025-12-02
Supplement: Supplementary file 1 [file c7bfa5c901d6bf5785db6578.docx]

**Table S1** Comparison of demographic characteristics between the transfusion and non-transfusion groups across BW and GA subgroups

|  | **GA＜28W (n=136)** | | | | **GA≥28W (n=442)** | | | |
| --- | --- | --- | --- | --- | --- | --- | --- | --- |
| **Non-transfusion**  **(n=50)** | **Transfusion**  **(n=86)** | **U/χ²** | ***p-*value** | **Non-transfusion**  **(n=407)** | **Transfusion**  **(n=35)** | **U/χ²** | ***p-*value** |
| BW(kg), median (IQR) | 1.010  (0.915-1.176) | 0.790 (0.695-0.905) | 869.0 | ＜0.001 | 1.580 (1.360-1.890) | 1.226 (1.026-1.510) | 3839.5 | ＜0.001 |
| Delivery Type |  |  |  |  |  |  |  |  |
| Vag, n (%) | 28 (56.00) | 49 (56.98) | 0.012 | 0.912 | 198 (48.65) | 17 (48.57) | 0.000 | 0.093 |
| Others, n (%) | 22 (44.00) | 37 (43.02) | 209 (51.35) | 18 (51.43) |
|  | **BW＜1.5kg (n=321)** | | | | **BW≥1.5kg (n=257)** | | | |
|  | **Non-transfusion**  **(n=209)** | **Transfusion**  **(n=112)** | **U/χ²** | ***p-*value** | **Non-transfusion**  **(n=248)** | **Transfusion**  **(n=9)** | **U/χ²** | ***p-*value** |
| GA(weeks), median (IQR) | 29.5 (28.1-31.1) | 26.0 (25.0-27.7) | 3595.5 | ＜0.001 | 32.0 (31.3-32.5) | 31.6 (30.5-32.0) | 777.0 | 0.117 |
| Delivery Type |  |  |  |  |  |  |  |  |
| Vag, n (%) | 94 (44.98) | 62 (55.36) | 3.146 | 0.076 | 130 (52.42) | 4 (44.44) | 0.131 | 0.717 |
| Others, n (%) | 115 (55.02) | 50 (44.64) | 127 (51.21) | 5 (55.56) |

GA=gestational age in weeks at birth, BW=birth weight in grams

**Table S2** Comparison of DR indicators between the transfusion and non-transfusion groups across birth weight and gestational age subgroups

|  | **GA＜28W (n=136)** | | | | **GA≥28W (n=442)** | | | |
| --- | --- | --- | --- | --- | --- | --- | --- | --- |
| **Non-transfusion**  **(n=50)** | **Transfusion**  **(n=86)** | **U/χ²** | ***p-*value** | **Non-transfusion**  **(n=407)** | **Transfusion**  **(n=35)** | **U/χ²** | ***p-*value** |
| Apgar 1, median (IQR) | 6 (4-7) | 5 (3-7) | 1850.0 | 0.172 | 7 (6-8) | 6 (3-8) | 4937.5 | 0.002 |
| Apgar 5, median (IQR) | 8 (6-9) | 7 (5-8) | 1590.0 | 0.010 | 8 (8-9) | 8 (7-8) | 5663.0 | 0.032 |
| Admit Temp-C, median (IQR) | 36.9 (36.6-37.3) | 36.9 (36.6-37.2) | 2117.5 | 0.883 | 36.9 (36.7-37.2) | 36.8 (36.6-37.2) | 6450.5 | 0.353 |
| Intubation，n (%) | 7 (14.00) | 31 (36.05) | 7.633 | 0.006 | 12 (2.95) | 4 (11.43) | 4.435 | 0.035 |
| Cardiac Compression，n (%) | 1 (2.00) | 5 (5.81) | 0.374 | 0.541 | 4 (0.98) | 1 (2.86) | 0.030 | 0.862 |
|  | **BW＜1.5kg (n=321)** | | | | **BW≥1.5kg (n=257)** | | | |
|  | **Non-transfusion**  **(n=209)** | **Transfusion**  **(n=112)** | **U/χ²** | ***p-*value** | **Non-transfusion**  **(n=248)** | **Transfusion**  **(n=9)** | **U/χ²** | ***p-*value** |
| Apgar 1, median (IQR) | 7 (5-8) | 5.5 (3-7) | 8813.0 | ＜0.001 | 7 (6-8) | 6 (2-7) | 644.0 | 0.026 |
| Apgar 5, median (IQR) | 8 (7-9) | 7 (5-8) | 7837.0 | ＜0.001 | 8 (8-9) | 8(6-8) | 728.0 | 0.057 |
| Admit Temp-C, median (IQR) | 36.9 (36.6-37.1) | 36.9 (36.6-37.2) | 10963.0 | 0.348 | 37.0 (36.7-37.2) | 36.7 (36.5-37.1) | 810.0 | 0.161 |
| Intubation，n | 14 (6.70) | 33 (29.46) | 30.240 | ＜0.001 | 5 (2.02) | 2 (22.22) | 6.843 | 0.009 |
| Cardiac Compression，n (%) | 3 (1.44) | 6 (5.36) | 2.802 | 0.094 | 2 (0.81) | 0 (0) | -* | 1.000 |

* Fisher’s exact test.

**Table S3** Comparison of neonatal outcomes between the transfusion and non-transfusion groups across birth weight and gestational age subgroups

|  | **GA＜28W (n=136)** | | | | **GA≥28W (n=442)** | | | |
| --- | --- | --- | --- | --- | --- | --- | --- | --- |
| **Non-transfusion**  **(n=50)** | **Transfusion**  **(n=86)** | **χ²** | ***p-*value** | **Non-transfusion**  **(n=407)** | **Transfusion**  **(n=35)** | **χ²** | ***p-*value** |
| CLD，n (%) | 9 (18.00) | 49 (56.98) | 19.638 | ＜0.001 | 14 (3.44) | 5 (14.29) | 9.216 | 0.002 |
| Death，n (%) | 0 (0) | 4 (4.65) | -* | 0.296 | 0 (0) | 1 (2.86) | -* | 0.079 |
| Intubation，n (%) | 14 (28.00) | 72 (83.72) | 42.226 | ＜0.001 | 39 (9.58) | 16 (45.71) | 38.618 | ＜0.001 |
| Severe_ROP，n (%) | 1 (2.00) | 20 (23.62) | 9.373 | 0.002 | 1 (0.25) | 2 (5.71) | 7.336 | 0.007 |
| NEC，n (%) | 0 (0) | 10 (11.63) | -* | 0.013 | 2 (0.49) | 3 (8.57) | 12.282 | ＜0.001 |
| IVH，n (%) | 12 (24.00) | 34 (39.53) | 3.409 | 0.065 | 32 (7.86) | 8 (22.86) | 8.382 | 0.004 |
| IVH_Severe，n (%) | 2 (4.00) | 13 (15.12) | 2.929 | 0.087 | 4 (0.98) | 1 (2.86) | 0.030 | 0.862 |
| Survival_wo_Major_Morbidity，n (%) | 23 (46.00) | 15 (17.44) | 12.807 | ＜0.001 | 183 (44.96) | 7 (20.00) | 8.195 | 0.004 |
|  | **BW＜1.5kg (n=321)** | | | | **BW≥1.5kg (n=257)** | | | |
|  | **Non-transfusion**  **(n=209)** | **Transfusion**  **(n=112)** | **χ²** | ***p-*value** | **Non-transfusion**  **(n=248)** | **Transfusion**  **(n=9)** | **χ²** | ***p-*value** |
| CLD，n(%) | 22 (10.53) | 54 (48.21) | 55.252 | ＜0.001 | 1 (0.40) | 0 (0) | -* | 1.000 |
| Death，n(%) | 0 (0) | 5 (4.46) | -* | 0.005 | 0 (0) | 0 (0) | -* | - |
| Intubation，n(%) | 35 (16.75) | 80 (71.43) | 94.841 | ＜0.001 | 18 (7.26) | 8 (88.89) | 63.643 | ＜0.001 |
| Severe_ROP，n(%) | 2 (0.96) | 22 (19.64) | 34.155 | ＜0.001 | 0 (0) | 0 (0) | -* | - |
| NEC，n(%) | 0 (0) | 12 (10.71) | -* | ＜0.001 | 2 (0.81) | 1 (11.11) | 1.557 | 0.212 |
| IVH，n(%) | 30 (14.35) | 39 (34.82) | 18.103 | ＜0.001 | 24 (9.68) | 3 (33.33) | 2.959 | 0.085 |
| IVH_Severe，n(%) | 5 (2.39) | 14 (12.50) | 13.379 | ＜0.001 | 2 (0.81) | 0 (0) | -* | 1.000 |
| Survival_wo_Major_Morbidity，n(%) | 85 (40.67) | 21 (18.75) | 15.842 | ＜0.001 | 121 (48.79) | 1 (11.11) | 3.549 | 0.060 |

CLD=chronic lung disease, ROP=retinopathy of prematurity, NEC=necrotizing enterocolitis, IVH=intraventricular hemorrhage, Survival_wo_Major_Morbidity=survival without severe intraventricular hemorrhage, severe retinopathy of prematurity, late onset sepsis, necrotizing enterocolitis or chronic lung disease

* Fisher’s exact test.
